# Supplementary material
Source: MDPI journal article supplement (https://www.mdpi.com/2411-5150/3/4/53)
Supplement: s1 [file s1]

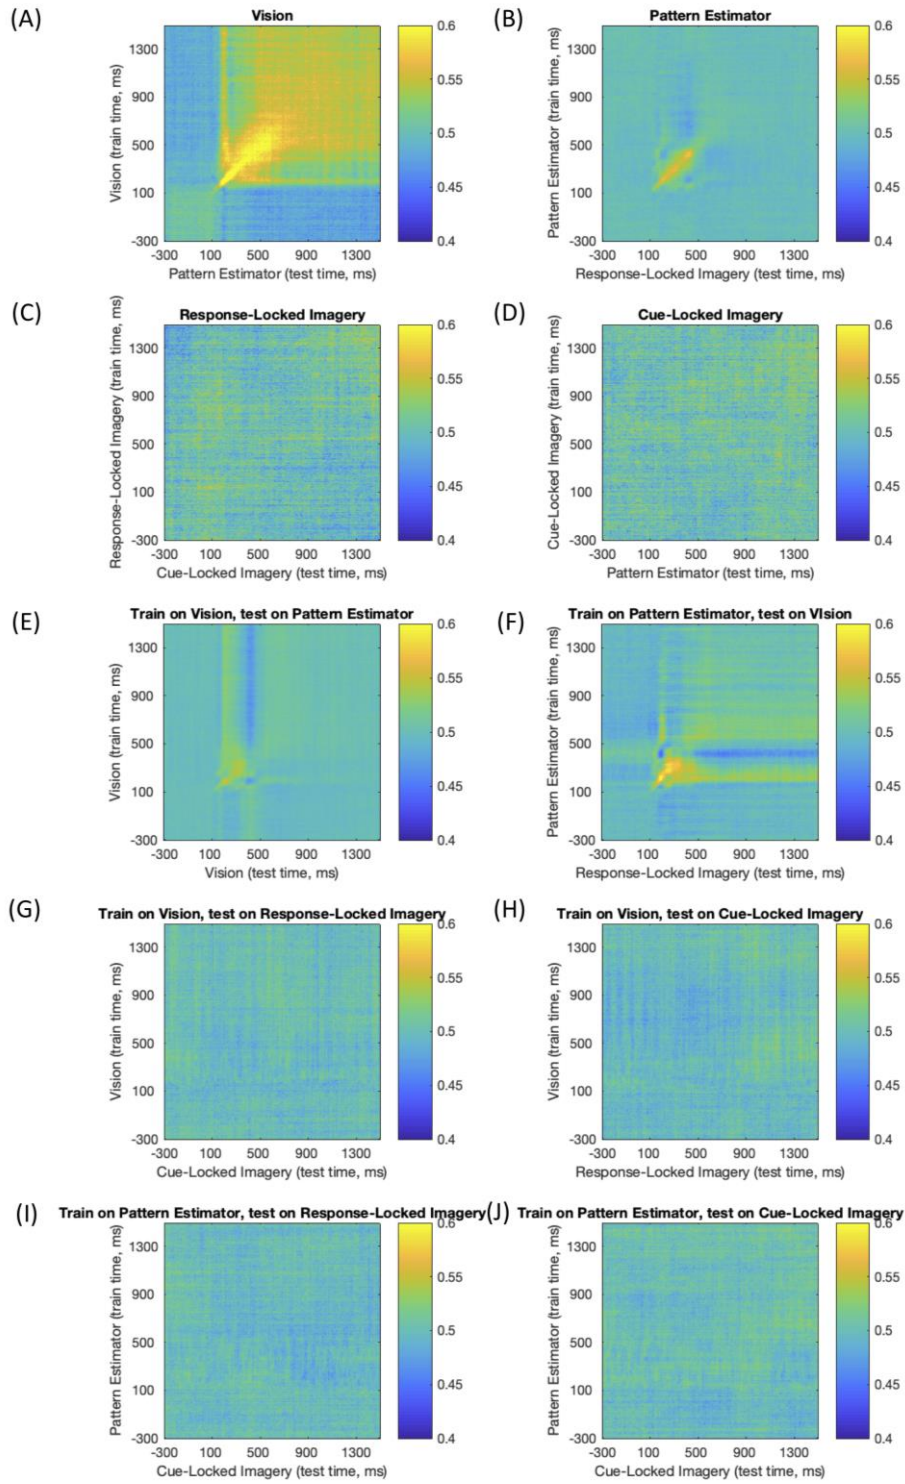

**Figure S1.** Temporal generalisation for cross-decoding analyses. For all plots, a classifier is trained on the time points on the y-axis, and then tested on all the points on the x-axis. The colour scale represents the decoding accuracy for each combination of time points. Each graph illustrates a different combination of training and testing data. For the within-epoch decoding (A-D), data were evenly split between training and testing sets. .

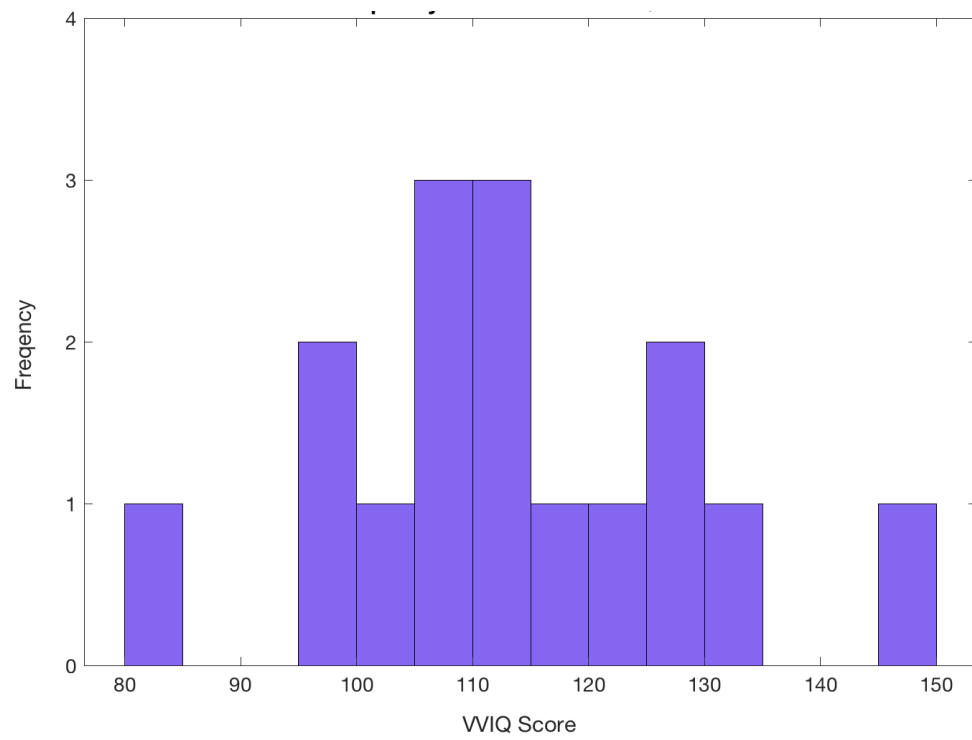

**Figure S2.** Frequency Distribution of scores in the Vividness of Visual Imagery Questionnaire overall scores. Scores are calculated out of a possible 160 by summing responses to each question completed with the eyes open and with the eyes closed. .
